# Effect of PEEP and Tidal Volume on Ventilation Distribution and End-Expiratory Lung Volume: A Prospective Experimental Animal and Pilot Clinical Study

Günther Zick<sup>1\*</sup>, Gunnar Elke<sup>1</sup>, Tobias Becher<sup>1</sup>, Dirk Schädler<sup>1</sup>, Sven Pulletz<sup>1</sup>, Sandra Freitag-Wolf<sup>2</sup>, Norbert Weiler<sup>1</sup>, Inéz Frerichs<sup>1</sup>

**1** University Medical Center Schleswig-Holstein, Campus Kiel, Department of Anesthesiology and Intensive Care Medicine, Kiel, Germany, **2** University Medical Center Schleswig-Holstein, Campus Kiel, Institute of Medical Informatics and Statistics, Kiel, Germany

## Abstract

**Introduction:** Lung-protective ventilation aims at using low tidal volumes ( $V_T$ ) at optimum positive end-expiratory pressures (PEEP). Optimum PEEP should recruit atelectatic lung regions and avoid tidal recruitment and end-inspiratory overinflation. We examined the effect of  $V_T$  and PEEP on ventilation distribution, regional respiratory system compliance ( $C_{RS}$ ), and end-expiratory lung volume (EELV) in an animal model of acute lung injury (ALI) and patients with ARDS by using electrical impedance tomography (EIT) with the aim to assess tidal recruitment and overinflation.

**Methods:** EIT examinations were performed in 10 anaesthetized pigs with normal lungs ventilated at 5 and 10 ml/kg body weight  $V_T$  and 5 cmH<sub>2</sub>O PEEP. After ALI induction, 10 ml/kg  $V_T$  and 10 cmH<sub>2</sub>O PEEP were applied. Afterwards, PEEP was set according to the pressure-volume curve. Animals were randomized to either low or high  $V_T$  ventilation changed after 30 minutes in a crossover design. Ventilation distribution, regional  $C_{RS}$  and changes in EELV were analyzed. The same measures were determined in five ARDS patients examined during low and high  $V_T$  ventilation (6 and 10 (8) ml/kg) at three PEEP levels.

**Results:** In healthy animals, high compared to low  $V_T$  increased  $C_{RS}$  and ventilation in dependent lung regions implying tidal recruitment. ALI reduced  $C_{RS}$  and EELV in all regions without changing ventilation distribution. Pressure-volume curve-derived PEEP of  $21 \pm 4$  cmH<sub>2</sub>O (mean  $\pm$  SD) resulted in comparable increase in  $C_{RS}$  in dependent and decrease in non-dependent regions at both  $V_T$ . This implied that tidal recruitment was avoided but end-inspiratory overinflation was present irrespective of  $V_T$ . In patients, regional  $C_{RS}$  differences between low and high  $V_T$  revealed high degree of tidal recruitment and low overinflation at  $3 \pm 1$  cmH<sub>2</sub>O PEEP. Tidal recruitment decreased at  $10 \pm 1$  cmH<sub>2</sub>O and was further reduced at  $15 \pm 2$  cmH<sub>2</sub>O PEEP.

**Conclusions:** Tidal recruitment and end-inspiratory overinflation can be assessed by EIT-based analysis of regional  $C_{RS}$ .

**Citation:** Zick G, Elke G, Becher T, Schädler D, Pulletz S, et al. (2013) Effect of PEEP and Tidal Volume on Ventilation Distribution and End-Expiratory Lung Volume: A Prospective Experimental Animal and Pilot Clinical Study. PLoS ONE 8(8): e72675. doi:10.1371/journal.pone.0072675

**Editor:** Rory Edward Morty, University of Giessen Lung Center, Germany

**Received:** November 14, 2012; **Accepted:** July 18, 2013; **Published:** August 22, 2013

**Copyright:** © 2013 Zick et al. This is an open-access article distributed under the terms of the Creative Commons Attribution License, which permits unrestricted use, distribution, and reproduction in any medium, provided the original author and source are credited.

**Funding:** The study was partially supported by Novalung, Hechingen, Germany (www.novalung.de). The funders had no role in study design, data collection and analysis, decision to publish, or preparation of the manuscript. No additional external funding was received for this study.

**Competing Interests:** Dr. Zick received partial financial funding from Novalung to perform the study. Dr. Elke received a restricted research grant from Cardinal Health for experimental studies unrelated to this work. Professor Frerichs received reimbursement of travel costs and speaking fees from Viasys Healthcare, Swisstrom, and Draeger Medical, respectively. All other authors declare that no competing interests exist. This does not alter the authors' adherence to all the PLOS ONE policies on sharing data and materials.

\* E-mail: guenther.zick@uksh.de

These authors contributed equally to this work.

## Introduction

It is well known that mechanical ventilation leads to lung injury. Dreyfuss and coworkers comprehensively showed the relationship between mechanical ventilation and pathologic lung tissue changes [1]. Liable factors inducing lung injury are high plateau pressures ( $P_{plat}$ ), high tidal volumes ( $V_T$ ) and cyclic opening and closing of alveoli (tidal recruitment) [2].

To minimize ventilator-induced lung injury the concept of lung-protective ventilation was introduced comprising the limitation of  $P_{plat}$ , reduction of  $V_T$  and optimization of positive end-expiratory

pressure (PEEP) [3–5]. The current recommendations advocate  $V_T$  of 6 ml/kg predicted body weight and  $P_{plat}$  lower than 30 cm H<sub>2</sub>O in patients with acute lung injury (ALI) and acute respiratory distress syndrome (ARDS). Whether this recommended  $V_T$  is optimal or whether the risk of ventilator-induced lung injury can be reduced by further reduction of  $V_T$  is still under debate. However,  $V_T$  lower than 6 ml/kg predicted body weight poses the risk of impaired alveolar ventilation and oxygenation [6,7].

Proposed measures to avoid derecruitment are increased PEEP and repeated recruitment maneuvers [8]. The effectiveness of these strategies to improve oxygenation was demonstrated in

multiple studies [9,10,11]. However, other studies revealed that these measures resulted in regional lung overinflation with subsequent lung tissue injury [8,12,13]. This may be one of the reasons why studies comparing different PEEP strategies were inconclusive and mostly failed to demonstrate the benefit of PEEP [5,8,14,15]. Individualized identification of optimal PEEP and  $P_{\text{plat}}$  according to mechanical properties of the lung and the thorax is discussed as a potential solution to the dilemma [4,16]. The goal should be to recruit the lung, to avoid tidal recruitment and end-inspiratory overinflation.

Electrical impedance tomography (EIT) may offer new diagnostic possibilities in the assessment of recruitment (increase in end-expiratory lung volume (EELV)), tidal recruitment (change in respiratory system compliance ( $C_{\text{RS}}$ ) with different  $V_{\text{T}}$ ) and end-inspiratory overdistension (decrease in  $C_{\text{RS}}$ ) in mechanically ventilated patients with ARDS. Since EIT can determine regional distribution of ventilation, changes in EELV [17–20], and  $C_{\text{RS}}$  [21,22] it might be applied at the bedside in addition to the measurement of global respiratory mechanics and gas exchange. Previous studies employed EIT to identify recruitment, derecruitment and overinflation. In these studies the following strategies were mainly used: stepwise variation of PEEP [23] and the low flow inflation [24,25] or the stepwise airway pressure increase [26].

To our knowledge, it is not predictable how distribution of ventilation, regional EELV, and regional  $C_{\text{RS}}$  are affected by concomitant changes in  $V_{\text{T}}$  and PEEP in patients with severe ARDS. Thus, the goal of this experimental study was to perform EIT measurements during ventilation with low and high  $V_{\text{T}}$  at a preset PEEP to detect tidal recruitment. We hypothesized that low PEEP would lead to tidal recruitment whereas high PEEP, especially in combination with high  $V_{\text{T}}$ , would lead to overinflation of at least some parts of the lung. The model and the hypothesis on which the model is based are described in more detail in Text S1 and Figure S1. We additionally checked whether this EIT-based analysis revealed tidal recruitment and end-inspiratory overinflation in pilot examinations in critically ill patients with mild and moderate ARDS.

## Materials and Methods

### Experimental study

The experimental study was performed on ten anesthetized supine pigs of both sexes (Deutsches Landschwein, Institute of Animal Breeding and Husbandry, Christian Albrechts University, Kiel, Germany) with a body weight (BW) of  $50 \pm 5$  kg (mean  $\pm$  SD). It was carried out in strict accordance with the guidelines on animal experimentation. The protocol was approved by the Committee for Animal Care of the Christian-Albrechts University, Kiel, Germany (Permit Number: V 742-72241.121-39 (80-10/03)). All surgery was performed under anesthesia with propofol and sufentanil and all efforts were made to minimize suffering.

### Animal preparation

After sedation with azaperon (8 mg/kg BW) and atropine (0.1 mg/kg) general anesthesia was started with ketamine (5 mg/kg BW), sufentanil (0.2  $\mu$ g/kg BW) and propofol (1 mg/kg BW). Anesthesia was continued with intravenous infusion of propofol (6 to 12 mg/kg BW per hour) and sufentanil (10  $\mu$ g/kg BW per hour). Vecuronium bromide (0.1 mg/kg BW) was administered for muscle paralysis. An infusion of lactated Ringers solution was given at a rate of 20 ml/kg BW per hour. If hypovolemia was suspected additional hydroxyethyl starch and Ringers solution were given. Norepinephrine was infused to maintain the mean arterial pressure above 70 mm Hg.

### Mechanical ventilation and induction of ALI

Throughout the experiment, the animals were ventilated in a volume-controlled mode (Avea, CareFusion, Höchberg, Germany) at 20 breaths/min with the ratio of inspiration and expiration times (I:E) of 1:1.5. ALI was induced by repeated bronchoalveolar lavage with 1.5 L of warm saline solution until arterial partial pressure of oxygen ( $P_{\text{aO}_2}$ ) remained stable below 100 torr at an inspired oxygen fraction ( $F_{\text{IO}_2}$ ) of 1.0 and PEEP of 10 cm  $\text{H}_2\text{O}$  for 30 min. The animals were ventilated with  $V_{\text{T}}$  of 5 and 10 ml/kg BW both before and after ALI induction. These are referred to as low and high  $V_{\text{T}}$  throughout the text.

A constant low-flow (2.5 l/min) inflation (pressure-volume (PV) maneuver with an inspiratory volume limit of 1.5 l was performed starting at zero end-expiratory pressure. Afterwards, positive end-expiratory pressure (PEEP) was set 2 cm  $\text{H}_2\text{O}$  above the lower inflection point (LIP) identified in the PV curve. An additional image file shows the PV curve obtained from a representative animal (Figure S2).

### Interventional lung assist device

A pumpless extracorporeal interventional lung assist device (ILA, Novalung, Hechingen, Germany) was applied in all animals allowing control of arterial partial pressure of carbon dioxide ( $P_{\text{aCO}_2}$ ) independent of the ventilator pattern [27,28]. A 13 Fr cannula was inserted into the iliac artery with ultrasound guidance and a 15 Fr cannula into the iliac vein using Seldingers technique. The ILA device was prefilled with saline solution and connected to both cannulae. 5000 units of heparin were given after the instrumentation was completed. ILA was only used after induction of ALI during low  $V_{\text{T}}$  ventilation. Oxygen flow was set to 10 l/min to achieve a  $P_{\text{aCO}_2}$  of 40 mmHg.

### Electrical Impedance Tomography

EIT measurements were performed with the Goe-MF II system (CareFusion, Höchberg, Germany) using a set of 16 electrodes (Blue Sensor BR-50-K, Ambu, Ølstykke, Denmark) placed on the thoracic circumference at the fifth-sixth intercostal space. EIT data were acquired with a scan rate of 25 Hz. EIT images were generated using the filtered back-projection algorithm [29]. The data were filtered using a digital low-pass filter with a cut-off frequency of 1 Hz to eliminate small impedance changes synchronous with the heart beat.

### Experimental protocol

A flowchart of the experimental protocol is provided in Figure 1. EIT scanning was performed during baseline conditions and at six subsequent measurement time points as described below:

- Baseline: Pigs were ventilated with  $F_{\text{IO}_2}$  of 0.5,  $V_{\text{T}}$  of 5 ml/kg BW and PEEP of 5 cm  $\text{H}_2\text{O}$ . ILA was inactive.
- Time point 1:  $V_{\text{T}}$  was set to 10 ml/kg BW while other settings remained unchanged.
- Time point 2: After induction of ALI,  $F_{\text{IO}_2}$  was set to 1.0,  $V_{\text{T}}$  10 ml/kg BW, PEEP 10 cm  $\text{H}_2\text{O}$  and ILA inactive.

Animals were then allocated to either ventilation with low  $V_{\text{T}}$  and active ILA or to ventilation with high  $V_{\text{T}}$  and inactive ILA in randomized order (5 animals in each randomization arm). After 30 minutes, the applied  $V_{\text{T}}$ /ILA pattern was changed in a crossover design where each animal served as its own control.

- Time points 3 and 5: 5 minutes after ventilation with the set  $V_{\text{T}}$ /ILA pattern.

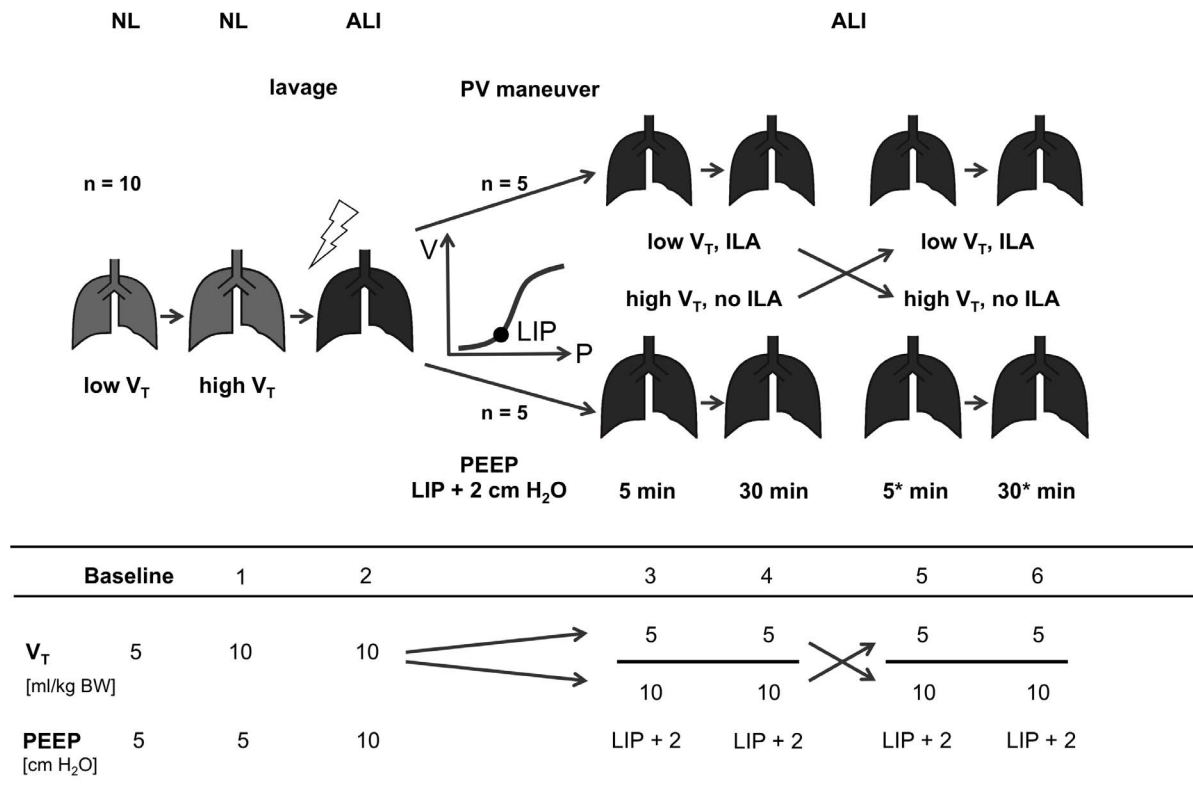

**Figure 1. Study flowchart.** Ten animals were studied during volume-controlled ventilation during ventilation with 5 ml/kg (baseline) and 10 ml/kg tidal volume ( $V_T$ ) (measurement time point 1) in the normal lung (NL) as well as after induction of acute lung injury (ALI) (time point 2) at inspired fractions of oxygen of 0.5 and 1.0, respectively. Then a constant low-flow inflation maneuver (pressure-volume (PV) maneuver) was performed and positive end-expiratory pressure (PEEP) was set 2 cm H<sub>2</sub>O above the lower inflection point (LIP) identified in the PV curve. Using a crossover design, further measurements were performed 5 and 30 min after ventilation with low  $V_T$  and active interventional lung assist (ILA) and after another 5 and 30 min with high  $V_T$  and inactive ILA (no ILA) (time points 3–6). Five animals were randomly ventilated in the reversed chronological order. Ventilator settings of  $V_T$  and PEEP at each measurement time point are shown in the lower part of the Figure. \*, time elapsed after the change in ventilator and ILA settings.

doi:10.1371/journal.pone.0072675.g001

- Time points 4 and 6: 30 minutes after ventilation with the set  $V_T$ /ILA pattern.

At baseline and at each measurement time point, heart rate, mean arterial pressure, inspiratory peak pressure ( $P_{\text{insp}}$ ), plateau pressure ( $P_{\text{plat}}$ ) and end-expiratory partial pressure of CO<sub>2</sub> ( $P_{\text{CO}_2}$ ) were determined and EIT data acquired during 60 seconds. (To account for the crossover design, the data obtained at identical  $V_T$ /ILA settings were combined. This resulted in the merged time points 5/3 and 6/4 for low  $V_T$  and 3/5 and 4/6 for high  $V_T$  ventilation).

Blood gases were measured at time point 1, after ALI induction (i.e. time point 2), immediately after the pressure-volume maneuver was performed (during ventilation with high  $V_T$  and PEEP set 2 cmH<sub>2</sub>O above LIP) and at the end of the experiment to check for the stability of the ALI model.

### EIT data analysis

Functional EIT scans were generated from each measurement using an established approach [19]. They showed the distribution of regional  $V_T$  in the chest cross-section by calculating the tidal amplitudes of relative impedance change in 912 image pixels (Figure 2).

Ventrodorsal profiles of fractional  $V_T$  in 32 layers were generated from the functional ventilation scans and the geomet-

rical centers of ventilation were calculated in relation to the ventrodorsal chest diameter as previously described [30–32].

To compare and display changes in ventilation distribution between the baseline and individual measurement time points, EIT ventilation difference images [33] and regional ventilation difference profiles were generated (Figures 2 and 3). Changes in EELV between individual time points and baseline were analyzed by calculating the differences between the minimum (end-expiratory) values of ventilation-related relative impedance change.

Finally, global  $C_{RS}$  was calculated as  $V_T/(P_{\text{plat}} - \text{PEEP})$  and regional  $C_{RS}$  determined in each of the 32 layers as  $((\text{fraction of } V_T) \cdot V_T)/(P_{\text{plat}} - \text{PEEP})$ . Corresponding to the ventilation profiles described above, regional  $C_{RS}$  and  $C_{RS}$  difference profiles were generated (Figure 3).

### Pilot patient study

The study was approved by the Ethics committee of the Christian-Albrechts University, Kiel, Germany (“Bestimmung der globalen und regionalen Atemmechanik bei unterstützter Spontanatmung” Permit Number: A 125/12). Written informed consent was obtained from each patient or their legal representative, respectively.

We included five adult patients (age  $74 \pm 6$  years, height  $174 \pm 5$  cm, weight  $77 \pm 15$  kg) with mild and moderate ARDS

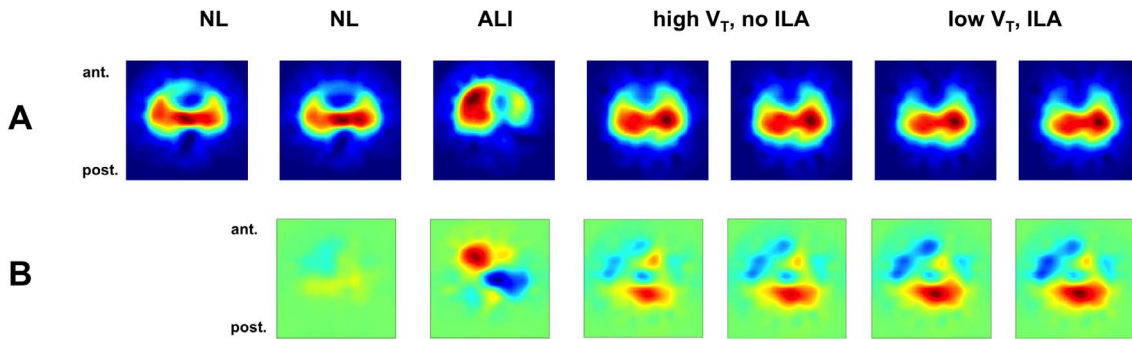

| Time                       | Baseline | 1  | 2  | 3       | 4       | 5       | 6       |
|----------------------------|----------|----|----|---------|---------|---------|---------|
| $V_T$ [ml/kg BW]           | 5        | 10 | 10 | 10      | 10      | 5       | 5       |
| PEEP [cm H <sub>2</sub> O] | 5        | 5  | 10 | LIP + 2 | LIP + 2 | LIP + 2 | LIP + 2 |

**Figure 2. Regional ventilation distribution.** Examples of functional EIT scans of regional lung ventilation in animal 2 during all measurement time points (see Figure 1 for explanation). The orientation of the scans is indicated (ant., anterior; post., posterior). Panel A: Ventilated areas within the chest cross-section exhibit higher values of relative impedance change and are shown in red tones. In normal lungs (NL), symmetrical ventilation distribution between the right and left lung regions was found. With induction of acute lung injury (ALI), higher ventilation in the right lung region with pronounced ventilation in its ventral part and reduced left lung ventilation especially in its dorsal part were found. After PEEP was set 2 cm H<sub>2</sub>O above the lower inflection point (LIP) according to the pressure-volume curve, a shift in ventilation toward the dependent (dorsal) lung regions was observed. No obvious difference between ventilation with 10 ml/kg  $V_T$  and inactive interventional lung assist (ILA) (high  $V_T$ , no ILA) and ventilation with 5 ml/kg  $V_T$  and active ILA (low  $V_T$ , ILA) was detected. Panel B: Ventilation difference scans of the same animal. Red color indicates increase in regional ventilation, blue color shows the decrease in ventilation compared with baseline.  
doi:10.1371/journal.pone.0072675.g002

according to the Berlin definition [34] treated in our surgical intensive care unit. ARDS resulted from severe sepsis ( $n = 4$ ) and pneumonia ( $n = 1$ ). Anaesthesia was performed with sufentanil and propofol and if required for an intervention or intubation muscle paralysis was induced with rocuronium. Patients were ventilated with Evita XL (Dräger Medical AG & Co., Lübeck, Germany) in the pressure-controlled mode. During the study period volume-controlled mode was used. A low-flow (4 L/min) PV maneuver was started at PEEP of 0 cm H<sub>2</sub>O with an inspiratory volume limit of 2 L and a pressure limit of 35 cm H<sub>2</sub>O. Afterwards, PEEP was set at three different levels according to the LIP. We started with a PEEP of LIP+2 cm H<sub>2</sub>O followed by LIP-5 cm H<sub>2</sub>O and LIP+7 cm H<sub>2</sub>O. At each PEEP level, patients were first ventilated with low  $V_T$  (6 ml/kg BW) followed by high  $V_T$  (10 ml/kg BW) for 5 minutes. The lowest PEEP was second in order to avoid unnecessary long derecruitment and followed by the highest PEEP. We a priori decided not to exceed a pressure limit of 40 cm H<sub>2</sub>O at this PEEP level and, therefore, we reduced  $V_T$  to 8 ml/kg BW.

EIT examinations and data analyses were performed exactly as described above in sections on the experimental study. (The only difference was that we used the L-00-S electrodes (Ambu, Ølstykke, Denmark) in patients.) We calculated  $C_{RS}$  at each PEEP level and each  $V_T$  and the  $C_{RS}$  differences between high and low  $V_T$  at each PEEP level.

### Statistical analysis

Since normal distribution assumption was not violated (Shapiro-Wilk-test), data are presented as means $\pm$ SD and analyzed parametrically with paired t test or repeated-measures ANOVA as appropriate. The pilot patient data were analyzed using descriptive statistics as means $\pm$ SD.

The statistical analysis was conducted using SPSS version 17.0 (SPSS Inc., Chicago, IL, USA). All statistical tests were two-sided and the level of significance was set at 5%.

## Results

### Experimental study

**Hemodynamics and global respiratory system mechanics.** All animals studied were included in the final analyses. Hemodynamic and respiratory data are summarized in Table 1.  $P_{CO_2}$  increased to about 60 torr during ventilation with high  $V_T$  and inactive ILA whereas ventilation with low  $V_T$  and active ILA resulted in normocapnia. Increasing  $V_T$  from 5 to 10 ml/kg BW did not significantly change global  $C_{RS}$  in the healthy lungs. ALI reduced  $C_{RS}$  markedly to about 50% of baseline values despite PEEP increase to 10 cm H<sub>2</sub>O. Application of PEEP according to LIP restored  $C_{RS}$  only partially.

**Regional distribution of ventilation and respiratory system compliance.** Increasing  $V_T$  in the healthy lung from 5 to 10 ml/kg BW led to a small but significant redistribution of ventilation in favor of the dependent lung regions. The geometrical center of ventilation moved slightly but significantly downwards (Figure 4). This went along with an increase in regional  $C_{RS}$  in the dependent parts of the lung (Figure 3).

In ALI, a homogenous reduction in  $C_{RS}$  throughout the lung was observed during ventilation with high  $V_T$  despite increased PEEP of 10 cmH<sub>2</sub>O (Figure 4). Distribution of ventilation was not different compared to the healthy lung (Figure 4). Increasing PEEP to 2 cm H<sub>2</sub>O above the LIP of the pressure-volume curve restored regional  $C_{RS}$  to initial values in the dependent lung regions and reduced it in the non-dependent ones. Accordingly, distribution of ventilation was directed more toward the dependent lung regions as reflected by the downward shift in geometrical centers of ventilation. There was no difference in ventilation distribution and

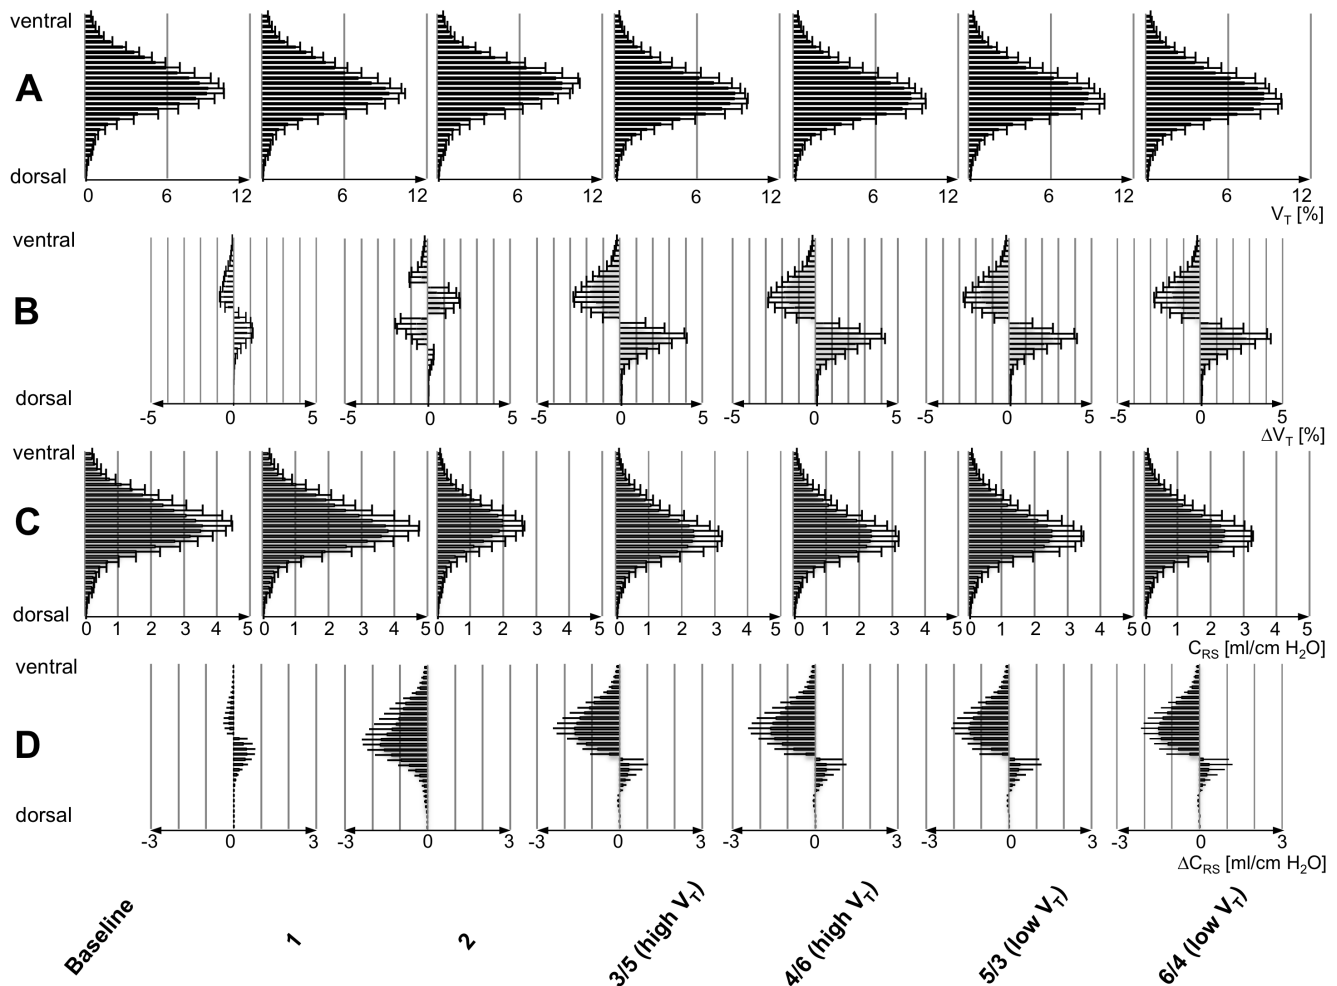

**Figure 3. Regional ventilation and respiratory system compliance.** Ventrodorsal profiles of regional tidal volume ( $V_T$ ) (A), regional respiratory system compliance ( $C_{RS}$ ) (C) and differences in regional  $V_T$  ( $\Delta V_T$ ) (B) and regional  $C_{RS}$  ( $\Delta C_{RS}$ ) (D) with respect to baseline (mean values  $\pm$ SD in 10 animals). Panel A ( $V_T$  [%]) shows the relative distribution of  $V_T$  in 32 horizontal layers in% of overall  $V_T$  in the chest cross-section. Panel B ( $\Delta V_T$  [%]) indicates the respective differences in regional  $V_T$  compared with baseline. It shows a shift in ventilation toward the dorsal regions already with higher  $V_T$  at time point 1 in normal lung and more pronounced shifts at points 3 through 6 with a PEEP set 2 cm  $H_2O$  above the lower inflection point in acute lung injury (ALI). Panel C ( $C_{RS}$  [ml/kg  $H_2O$ ]) shows regional  $C_{RS}$  in the same 32 layers with the respective differences to baseline provided in panel D ( $\Delta C_{RS}$  [ml/kg  $H_2O$ ]). The differences in regional  $C_{RS}$  indicate slightly lower and higher  $C_{RS}$  in the ventral and dorsal regions at time point 1. Significantly lower values were found in layers 7 to 12 and significantly higher ones in layers 16 to 25 (layers counting from 1 to 32 in the ventrodorsal direction). ALI (time point 2) resulted in significant decrease in  $C_{RS}$  in all layers. A small increase in  $C_{RS}$  in the dorsal regions (significant in layers 23 and 24) with the decreased  $C_{RS}$  in the ventral regions (significant in layers 1 to 17 and 27 and 28) at time point 3/5. At all other three time points, the findings were comparable. High  $V_T$ , ventilation with 10 ml/kg BW, low  $V_T$ , ventilation with 5 ml/kg BW. doi:10.1371/journal.pone.0072675.g003

regional  $C_{RS}$  between ventilation with 5 or 10 ml/kg BW at the four measurement time points with PEEP increased to 2 cm  $H_2O$  above LIP (Figures 3 and 4).

**End-expiratory lung volume.** Regardless of the applied  $V_T$ , EELV did not change in the healthy lung (Figure 5). ALI led to a pronounced loss in EELV despite PEEP of 10 cm  $H_2O$ . This volume loss could only partially be regained when increased PEEP was set according to the pressure-volume curve with high variability among the animals (Figure 5).

**Stability of the model.** There were no significant differences in gas exchange between the initial measurement after induction of ALI and the final measurements at the end of the experimental protocol (Table 2).

### Pilot patient study

Respiratory and hemodynamic data are given in Table 3. LIP was identified at  $8 \pm 2$  cm  $H_2O$ . Regional  $C_{RS}$  differences at the respective PEEP levels are shown in Figure 6. At the lowest PEEP of  $3 \pm 1$  cm  $H_2O$  we found a pronounced increase in  $C_{RS}$  in the dorsal regions and a small decrease in the ventral regions with high  $V_T$ . At PEEP of  $10 \pm 1$  cm  $H_2O$ , high  $V_T$  led to a smaller increase in  $C_{RS}$  in the dorsal regions and more pronounced reduction in the ventral parts than at the lowest PEEP. At PEEP of  $15 \pm 2$  cm  $H_2O$ , the  $C_{RS}$  difference between high and low  $V_T$  was even smaller.

### Discussion

Our study examined regional ventilation,  $C_{RS}$  and EELV using EIT at different  $V_T$  and PEEP in lung healthy animals and after

**Table 1.** Respiratory and hemodynamic data.

| Time point                               | Baseline | 1                 | 2                    | 3/5<br>(high V <sub>T</sub> ) | 4/6<br>(high V <sub>T</sub> ) | 5/3<br>(low V <sub>T</sub> ) | 6/4<br>(low V <sub>T</sub> ) |
|------------------------------------------|----------|-------------------|----------------------|-------------------------------|-------------------------------|------------------------------|------------------------------|
| F <sub>I</sub> O <sub>2</sub>            | 0.5      | 0.5               | 1                    | 1                             | 1                             | 1                            | 1                            |
| V <sub>T</sub> [ml]                      | 252±35   | 494±59            | 487±67               | 466±95                        | 466±95                        | 255±31                       | 255±31                       |
| PIP [cm H <sub>2</sub> O]                | 13±2     | 20±2 <sup>†</sup> | 35±3 <sup>§</sup>    | 42±6 <sup>§</sup>             | 41±6 <sup>§</sup>             | 31±4 <sup>†</sup>            | 31±4 <sup>†</sup>            |
| Plateau pressure [cm H <sub>2</sub> O]   | 12±2     | 17±3 <sup>†</sup> | 32±4 <sup>§</sup>    | 36±9 <sup>§</sup>             | 36±8 <sup>§</sup>             | 27±7 <sup>†</sup>            | 28±7 <sup>†</sup>            |
| PEEP [cm H <sub>2</sub> O]               | 5        | 5                 | 10                   | 21±4                          | 21±4                          | 21±4                         | 21±4                         |
| C <sub>RS</sub> [ml/cm H <sub>2</sub> O] | 40±10    | 42±10             | 22±7 <sup>§</sup>    | 27±8 <sup>§</sup>             | 28±8 <sup>§</sup>             | 29±9 <sup>*§</sup>           | 28±8 <sup>*&amp;</sup>       |
| Pco <sub>2</sub> [torr]                  | 46±10    | 39±9 <sup>*</sup> | 51±14                | 58±19 <sup>††</sup>           | 57±21 <sup>††</sup>           | 40±10 <sup>‡</sup>           | 42±12 <sup>*</sup>           |
| MAP [mm Hg]                              | 83±18    | 77±12             | 72±15                | 76±13                         | 71±9                          | 71±7                         | 67±5 <sup>*</sup>            |
| HR [1/min]                               | 95±14    | 99±13             | 132±16 <sup>††</sup> | 131±21 <sup>††</sup>          | 132±17 <sup>††</sup>          | 125±13                       | 132±16                       |

Data are shown as mean values ± standard deviation. V<sub>T</sub>: tidal volume, F<sub>I</sub>O<sub>2</sub>: fraction of inspired oxygen, PEEP: positive end-expiratory pressure, PIP: peak inspiratory pressure, C<sub>RS</sub>: respiratory system compliance, Pco<sub>2</sub>: end-expiratory partial pressure of carbon dioxide, MAP: mean arterial pressure, HR: heart rate. Due to the crossover design data obtained at identical V<sub>T</sub>/ILA settings were combined resulting in the merged time points 5/3 and 6/4 for low V<sub>T</sub> and 3/5 and 4/6 for high V<sub>T</sub> ventilation.

\*: vs. baseline (P<0.05).

‡: vs. baseline (P<0.01).

†: vs. baseline (P<0.0001).

††: vs. time point 1 (P<0.05).

†††: vs. time point 1 (P<0.001).

§: vs. time point 1 (P<0.0001).

§†: vs. time point 2 (P<0.01).

&: vs. time point 2 (P<0.05).

doi:10.1371/journal.pone.0072675.t001

induction of ALI. The protocol was designed to reflect clinical decision-making regarding the choice of PEEP and V<sub>T</sub> in ARDS patients. It tested the hypothesis that a variation of tidal volume at

a preset PEEP could be used to assess tidal recruitment and therefore guide the choice of adequate (optimum) PEEP. We subsequently applied this EIT-based approach developed in the

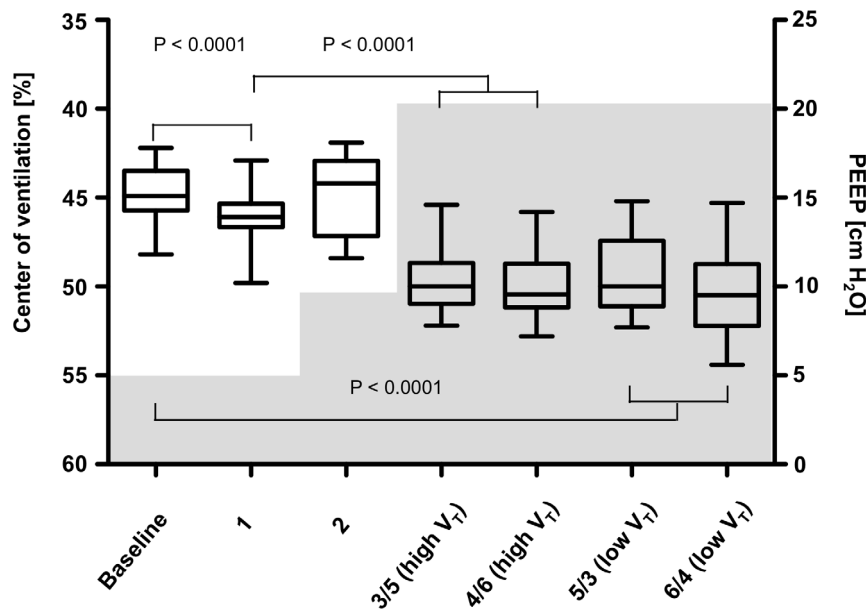

**Figure 4. Center of ventilation.** Ventilation distribution during individual measurement time points represented by the geometrical center of ventilation. The center of ventilation is given in percent of the anteroposterior chest diameter. Values above 50 indicate a location in the dorsal half of the chest cross-section. The median, the 25th and the 75th percentile, minimum and maximum values of ten animals are shown. The gray areas in the diagram show the positive end-expiratory pressure (PEEP) values during the individual measurement time points. Significant differences between corresponding high V<sub>T</sub> and low V<sub>T</sub> are indicated. Every group with ALI and high PEEP is significantly different from normal lung and ALI with PEEP 10 cm H<sub>2</sub>O (Time point 2). Left Y axis: center of ventilation, right Y axis: PEEP. High V<sub>T</sub>, ventilation with 10 ml/kg BW, low V<sub>T</sub>, ventilation with 5 ml/kg BW.

doi:10.1371/journal.pone.0072675.g004

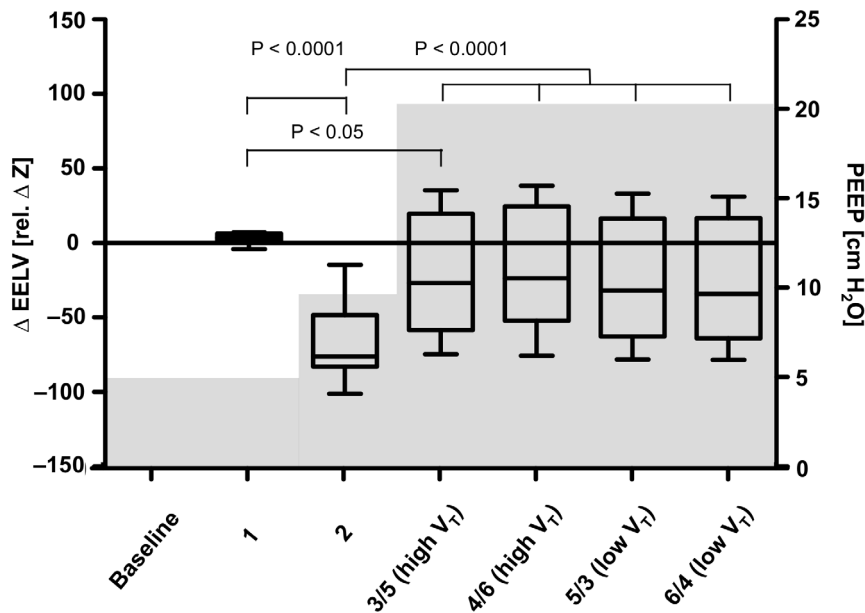

**Figure 5. End-expiratory lung volume.** Changes in end-expiratory lung volume ( $\Delta$ EELV) at individual measurement time points in comparison to baseline. The median, the 25th and the 75th percentile, minimum and maximum values of ten animals are shown. The gray areas in the diagram show the positive end-expiratory pressure (PEEP) values during the individual time points. Significant differences between the measurements are indicated. Left Y axis:  $\Delta$ EELV, right Y axis: PEEP. High  $V_T$ , ventilation with 10 ml/kg BW, low  $V_T$ , ventilation with 5 ml/kg BW. doi:10.1371/journal.pone.0072675.g005

experimental study in a small pilot study in mechanically ventilated patients.

In the experimental study, we found that an increase in  $V_T$  from 5 to 10 ml/kg BW led to an increase in regional  $C_{RS}$  and fractional ventilation in the dependent parts of the healthy lung. This is in accordance with our hypothesis that the application of different  $V_T$  at a distinct PEEP can be used in combination with EIT to assess the recruitment potential of the lung. The increase in  $C_{RS}$  in the dependent parts of the lung with high  $V_T$  is hereby interpreted as an increase in ventilated volume in these parts of the lung (Figure S1). With identical mechanical properties, an increase in ventilated volume leads to an increase in compliance. ALI induced a profound reduction in EELV accompanied by low global and regional  $C_{RS}$  despite the application of a PEEP of 10 cm  $H_2O$ . Surprisingly, the distribution of ventilation was similar to the healthy lung. The subsequent further PEEP increase according to the identified LIP of the pressure-volume curves restored  $C_{RS}$  to near baseline values in the dependent lung regions. However,  $C_{RS}$  in the ventral regions of the lung was markedly decreased implying overinflation. The fact that there was no difference in regional  $C_{RS}$  and distribution of ventilation between  $V_T$  of 5 and 10 ml/kg BW suggests that no tidal recruitment occurred. The fact that EELV did not reach the level observed in the normal lung even with the high PEEP has to be interpreted with caution, since the induction of ALI may have changed the electrical conductivity of the lung tissue [35].

### Recruitment and derecruitment

Our finding of dorsally directed shift in ventilation and increase in regional  $C_{RS}$  in the dependent lung regions at a PEEP of 5 cm  $H_2O$  and high  $V_T$  in normal lungs is in accordance with previous findings. Sinclair et al. who examined the effect of different PEEP (0 and 8 cm  $H_2O$ ) and  $V_T$  (6 and 12 ml/kg) on cyclic airway collapse and recruitment using aerosolized fluorescent microspheres in a rabbit model revealed that cyclic tidal recruitment

occurred with low PEEP in the healthy lung [36]. Improved ventilation in the dorsocaudal lung regions with high PEEP in that study was attributed to local recruitment with a postulated increase in regional  $C_{RS}$ .

In our study, a PEEP of 10 cm  $H_2O$  was not sufficiently high to prevent derecruitment after ALI induction as reflected by overall decrease in regional  $C_{RS}$ . This derecruitment could be reversed after the pressure-volume maneuver and subsequent application of higher PEEP of about 21 cm  $H_2O$ . At the same time, however, regional  $C_{RS}$  fell in the non-dependent regions when compared with baseline. Thus, although PEEP had the beneficial effect of recruiting the lung in the dependent regions and thereby avoiding tidal recruitment it also lead to regional overdistension. This phenomenon was also identified by Grasso et al. in three different pig models of ALI, including the lavage model, where overinflation was present in the baby lung despite recruited lung areas [6]. The concomitant existence of lung regions exhibiting recruitment and overinflation was also determined in patients with ALI [37], which renders the selection of adequate PEEP so difficult in individual patients.

### End-expiratory lung volume

In our study, ALI led to a pronounced reduction in EELV, which could not be offset by PEEP of 10 cm  $H_2O$ . By further increasing PEEP according to the pressure-volume curve, EELV increased.

Several studies have proven the ability of EIT to detect PEEP-dependent changes in EELV by analysis of end-expiratory impedance values [19,38–40] as used in our analysis. The fall in end-expiratory impedance values associated with ALI development has previously been described, although in an oleic acid ALI model [33]. Previous EIT studies using either two [41] or three electrode planes [19] demonstrated that EIT-based evaluation of EELV requires a cautious selection of the electrode plane. Therefore, we chose the midthoracic plane for our EIT

**Table 2.** Gas exchange data.

| Time point                 | Normal lung<br>(time point 1) | ALI<br>(time point 2) | PV maneuver | End of experiment   |
|----------------------------|-------------------------------|-----------------------|-------------|---------------------|
| $F_{iO_2}$                 | 0.5                           | 1                     | 1           | 1                   |
| $P_{aO_2}$ [torr]          | 234±40 <sup>†</sup>           | 120±27 <sup>**†</sup> | 420±110     | 133±27 <sup>†</sup> |
| $P_{aO_2}/F_{iO_2}$ [torr] | 468±80                        | 120±27                | 420±110     | 133±27              |
| $P_{aCO_2}$ [torr]         | 47±10                         | 58±11*                | 58±15       | 60±18*              |

Data are shown as mean values ± standard deviation. ALI: acute lung injury,  $F_{iO_2}$ : arterial oxygen saturation,  $P_{aO_2}$ : arterial partial pressure of oxygen,  $P_{aCO_2}$ : arterial partial pressure of carbon dioxide, P: pressure, V: volume.

At the time point 'PV maneuver', data was obtained immediately after the low-flow inflation maneuver during ventilation with high  $V_T$  and with PEEP set 2 cmH<sub>2</sub>O above the lower inflection point.

\*: vs. time point 1 ( $P<0.05$ ).

\*\* vs. time point 1 ( $P<0.001$ ).

†: vs. PV maneuver ( $P<0.0001$ ).

doi:10.1371/journal.pone.0072675.t002

measurements. With this approach, most of the lung tissue was included in the analysis because the examined chest slice was approximately 10 to 15 cm thick [42].

### Ventilation distribution

To characterize regional ventilation distribution by EIT, we have generated ventrodorsal ventilation profiles derived from the functional EIT scans and calculated the centers of ventilation [30,32,43]. This is a relatively simple but sensitive procedure that was previously applied to determine the effects of ventilation mode, PEEP, recruitment maneuvers or surfactant administration on ventilation distribution [30,31,43].

The redistribution of ventilation occurring between the individual measurement time points resulted in shifts of the centers of ventilation in the ventrodorsal direction. The dorsal shift identified in the animals ventilated with high  $V_T$  compared with low  $V_T$  before ALI implied tidal recruitment in the dependent lung regions. The centers of ventilation exhibited the dorsal most locations during ventilation with high PEEP set according to the pressure-volume curve after ALI. This was consistent with reduced ventilation in the non-dependent regions caused by overinflation accompanied by an increase in ventilation in the dependent regions caused by recruitment.

To better visualize the changes in regional ventilation induced by the study interventions (i.e., ALI, PEEP and  $V_T$  changes), we also calculated ventrodorsal profiles showing the differences in regional  $V_T$  at individual time points in comparison with baseline. These profiles highlighted the ventilation changes identified by the centers of ventilation by showing the respective changes in 32 chest layers.

### Regional respiratory system compliance

Although the topographical distributions of regional  $V_T$  and  $C_{RS}$  have to be identical by virtue of the underlying calculation of regional  $C_{RS}$ , the absolute values of regional  $C_{RS}$  reflect the changing respiratory system mechanics in the course of the experiment. This was detected especially after the induction of ALI (measurement time point 2) where a dramatic loss in regional  $C_{RS}$  was observed in all analyzed lung layers, whereas regional tidal volumes remained fairly unchanged (Figure 3).

The profiles of differences in regional  $C_{RS}$  detected the changing  $C_{RS}$  when compared with baseline: After the induction of ALI during ventilation at 10 cm H<sub>2</sub>O of PEEP (time point 2), a

marked decrease in  $C_{RS}$  was found. Higher regional  $C_{RS}$  in the dependent lung regions at high PEEP in the later phase after ALI could be attributed to recruitment of lung tissue as shown by Sinclair et al. [36]. The simultaneous decrease in regional  $C_{RS}$  in the ventral, non-dependent regions reflected regional overinflation. These results indicate that the distribution of regional  $C_{RS}$  and regional differences in  $C_{RS}$  are crucial for the interpretation of the PEEP and  $V_T$  effects and that the threshold PEEP, where tidal recruitment begins or ceases, might be the optimal PEEP to achieve best possible recruitment and minimal overinflation.

The importance of regional  $C_{RS}$  has also been highlighted by two recent EIT studies. Bikker et al. calculated  $C_{RS}$  in four horizontal chest layers at 15, 10, 5 and 0 cm H<sub>2</sub>O of PEEP during a decremental PEEP trial [41]. They found that high PEEP led to an increase in regional  $C_{RS}$  in the dependent part of the lung indicating recruitment but also to a decrease in  $C_{RS}$  in the non-dependent part suggesting overinflation. Dargaville et al. examined regional  $C_{RS}$  in three horizontal layers of the lungs during an incremental/decremental PEEP trial using a total of 11 PEEP steps [44]. Regional recruitment, derecruitment and overinflation could be detected and the PEEP value identified at which the most homogeneous  $C_{RS}$  distribution was achieved during the deflation limb of the maneuver. Our results show that a change in regional  $C_{RS}$  with different  $V_T$  can be used to determine recruitment potential, implying that tidal recruitment occurs and the choice of a higher PEEP could be advantageous.

### Interventional lung assist

Based on former studies [28,45], we presumed that ventilation with low  $V_T$  of 5 ml/kg BW would lead to CO<sub>2</sub> accumulation in our animal model of ALI which would not allow us to maintain the ventilatory pattern constant. Since we focused on the measurement of lung mechanics we considered it essential to keep the pattern constant throughout the whole experiment. The technique of interventional lung assist is easily available in our animal laboratory, therefore, we used it for CO<sub>2</sub> removal in the phases of ventilation with low  $V_T$ . When we designed the experimental protocol, we expected from our previous experience that the ventilation with high  $V_T$  during ALI would result in a  $P_{aCO_2}$  of about 40 mmHg. During the experiments we saw it was slightly higher, nevertheless, we decided to adhere to our original protocol.



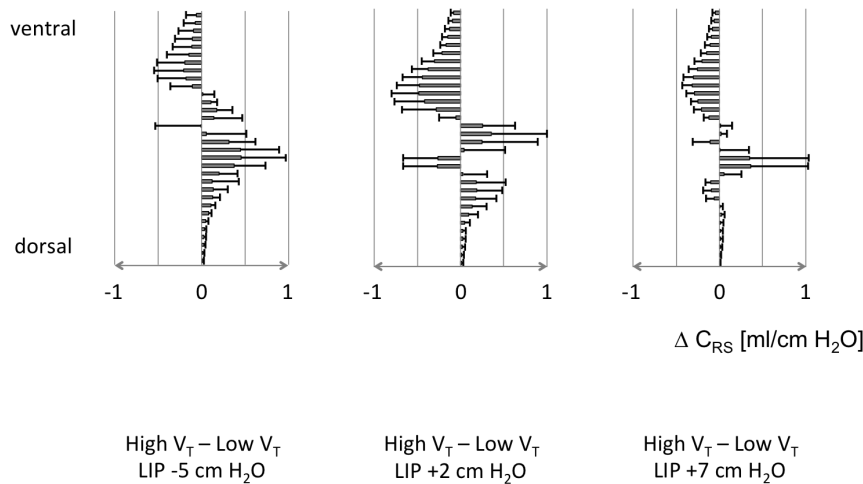

**Figure 6. Regional differences in respiratory system compliance.** Differences in regional respiratory system compliance ( $\Delta C_{RS}$ ) in 32 regions of interest in the chest cross-section in five patients with ARDS between ventilation at high and low tidal volume ( $V_T$ ) at three levels of positive end-expiratory pressure set according to the lower inflection point (LIP) of the quasistatic pressure-volume curve.  $\Delta C_{RS}$  are presented as ventrodorsal profiles. Values are means  $\pm$  SD.  
doi:10.1371/journal.pone.0072675.g006

#### Pilot patient data

In the animal experimental phase we could not identify any significant differences in  $C_{RS}$  between the low and high  $V_T$  after ALI because the lungs were already maximally inflated by the applied high PEEP. Therefore, we could not test our EIT-based approach of identifying tidal recruitment and end-inspiratory overinflation in the injured lungs of the studied animals. However, our pilot patient EIT data acquired at three PEEP levels, allowed us to apply this analysis. At the lowest PEEP, tidal recruitment in the dependent regions could clearly be identified. At the two higher PEEP values, progressive reduction in tidal recruitment was seen. End-inspiratory overinflation in the non-dependent regions was present already at the PEEP level of 2 cm  $H_2O$  above LIP. At the highest PEEP, regional overdistention at the higher of the two  $V_T$  values was blunted by the already present PEEP-induced overinflation. We postulate that the individual optimum PEEP could be derived from similar EIT examinations at the bedside in

the future: the variation of  $V_T$  at different PEEP levels could identify the settings with minimum tidal recruitment and minimum overinflation.

#### Limitations

- 1) We chose a lavage model of ALI well aware of the fact that it does not closely reflect the clinical situation because it is recruitable with PEEP and high  $V_T$  [46]. However, this was a desired feature of the model in our study in order to evaluate the ability of EIT to detect  $V_T$ -dependent tidal recruitment. We could show that our ALI model was stable during the experiment and did not exhibit spontaneous recruitment in the course of time.
- 2) We limited the experiment to the crucial measurement time points to exclude the influence of time and, therefore, we applied only the high but not the low  $V_T$  after ALI induction

**Table 3.** Respiratory and hemodynamic data of the studied patients.

| Time point                    | Baseline     | Low $V_T$    | High $V_T$   | Low $V_T$    | High $V_T$   | Low $V_T$    | High $V_T$   |
|-------------------------------|--------------|--------------|--------------|--------------|--------------|--------------|--------------|
|                               |              | LIP-5        | LIP-5        | LIP+2        | LIP+2        | LIP+7        | LIP+7        |
| $P_aO_2/F_{iO_2}$ [torr]      | 213 $\pm$ 63 |              | 183 $\pm$ 52 |              | 244 $\pm$ 62 |              | 277 $\pm$ 61 |
| $V_T$ [ml]                    |              | 418 $\pm$ 40 | 705 $\pm$ 68 | 418 $\pm$ 41 | 709 $\pm$ 61 | 419 $\pm$ 34 | 554 $\pm$ 46 |
| PIP [cm $H_2O$ ]              |              | 16 $\pm$ 1   | 26 $\pm$ 2   | 24 $\pm$ 2   | 34 $\pm$ 4   | 30 $\pm$ 2   | 37 $\pm$ 2   |
| Plateau pressure [cm $H_2O$ ] |              | 13 $\pm$ 1   | 19 $\pm$ 1   | 20 $\pm$ 2   | 28 $\pm$ 3   | 28 $\pm$ 1   | 33 $\pm$ 3   |
| PEEP [cm $H_2O$ ]             |              | 3 $\pm$ 1    | 3 $\pm$ 1    | 10 $\pm$ 1   | 10 $\pm$ 1   | 15 $\pm$ 2   | 16 $\pm$ 2*  |
| $C_{RS}$ [ml/cm $H_2O$ ]      |              | 43 $\pm$ 7   | 44 $\pm$ 8   | 42 $\pm$ 7   | 39 $\pm$ 9   | 36 $\pm$ 8   | 36 $\pm$ 10  |
| $P_aO_2$ [torr]               | 99 $\pm$ 23  |              | 85 $\pm$ 13  |              | 114 $\pm$ 21 |              | 130 $\pm$ 30 |
| $P_aCO_2$ [torr]              | 51 $\pm$ 12  |              | 59 $\pm$ 12  |              | 59 $\pm$ 13  |              | 64 $\pm$ 10  |
| HR [1/min]                    | 90 $\pm$ 20  | 85 $\pm$ 15  | 79 $\pm$ 18  | 84 $\pm$ 15  | 80 $\pm$ 17  | 84 $\pm$ 16  | 77 $\pm$ 11  |

Data are shown as mean values  $\pm$  standard deviation.  $V_T$ : tidal volume,  $F_{iO_2}$ : fraction of inspired oxygen, PEEP: positive end-expiratory pressure, PIP: peak inspiratory pressure,  $C_{RS}$ : respiratory system compliance,  $P_aCO_2$ : end-expiratory partial pressure of carbon dioxide, HR: heart rate.

\*The measurement at LIP+7 and high  $V_T$  was not conducted in patient 1 due to excess of peak inspiratory pressure limit of 40 cm  $H_2O$  (see Methods for further details).  
doi:10.1371/journal.pone.0072675.t003

with a PEEP of 10 cm H<sub>2</sub>O. We did not expect lacking tidal recruitment during ventilation at high PEEP set according to the pressure-volume curve, otherwise, we would have studied both V<sub>T</sub> at the lower PEEP of 10 cm H<sub>2</sub>O. Since the data analysis was performed offline it was too late to change the protocol. However, our pilot patient data acquired at lower PEEP values than in animal experiments could show that tidal recruitment could be reliably assessed by EIT-derived regional C<sub>RS</sub>.

- 3) EIT measurements were not compared with another established radiological imaging modality like computed tomography. This might be regarded as a limitation, however, the feasibility of EIT to assess regional ventilation has been previously validated with multiple standard imaging techniques [47–49].
- 4) EIT does not measure absolute lung volumes and thus we were only able to report relative changes in EELV. The validity of using relative instead of absolute lung volumes was previously confirmed by using the nitrogen washout technique [40].

## Conclusions

- 1) With a PEEP of 5 cm H<sub>2</sub>O, tidal recruitment was determined by EIT in the normal lung implying recruitment potential at this PEEP value.
- 2) PEEP set according to the pressure-volume curve at 2 cm H<sub>2</sub>O above LIP proved to be too high in the experimentally injured lung since no tidal recruitment was detected but pronounced regional overinflation was present in the non-dependent lung regions.
- 3) Regional tidal recruitment and end-inspiratory overinflation was identified in patients with ARDS with EIT by calculation of regional C<sub>RS</sub> differences from measurements acquired at different V<sub>T</sub> and PEEP.
- 4) Concomitant analysis of regional V<sub>T</sub>, EELV and C<sub>RS</sub> using EIT holds substantial potential to titrate lung protective ventilation by facilitating choice of adequate PEEP to avoid tidal recruitment and adequate V<sub>T</sub> to prevent overdistension.

## Supporting Information

**Figure S1** Explanation of the model. Schematic presentation of postulated changes in regional lung ventilation and regional respiratory system mechanics during different phases of the study protocol. Each large circle symbolizes ventilated lung volume. The small blue and large red circles represent normally aerated and

overdistended lung regions, respectively. The oval dark grey symbols indicate atelectatic lung regions. The transparent grey bars show schematically two of the 32 regions of interest (ROI) used in our EIT analysis. (The sizes of these representative ROIs were enlarged to enable better visual perception.) The effect of an intervention is displayed from left to right showing the compliance change in the pressure (P)-volume (V) coordinates in the respective ROI and the assumed differences in regional compliance ( $\Delta C$ ) in the whole lung. Upper panel: An increase in tidal volume (V<sub>T</sub>) at a given constant positive end-expiratory pressure (PEEP) increases the ventilation in the dependent parts of the lung by recruiting atelectatic lung regions (reduction of the dark grey oval symbols). Overdistension occurs in the non-dependent regions (increasing number of red circles). On the right, the decrease in compliance in the non-dependent ROI and its increase in the dependent ROI is explained in a P-V diagram. Additionally, the observed changes in the distribution of regional  $\Delta C$  is shown. Middle panel: The effect of acute lung injury (ALI) with an increase in atelectatic lung (higher number of dark grey oval symbols) and the decrease in regional compliance is shown. Lower panel: Applying high levels of PEEP after ALI results in reduction of atelectasis (reduction of the number of dark grey symbols) along with an increase in compliance in the dependent ROI but also leads to a higher degree of overdistension in the non-dependent ROI (higher number of large red circles).

(TIF)

**Figure S2** Low-flow inflation maneuver. Low-flow inflation maneuver (pressure-volume (PV) maneuver) with the lower inflection point (LIP) identified on the inflation limb of the curve at the airway pressure of 20 cmH<sub>2</sub>O. Original tracing obtained in one of the studied animals (animal 7). The values of inhaled air volume and airway pressure by the end of inflation are indicated in the grey boxes. Paw, pressure at the airway opening, V<sub>T</sub>, tidal volume.

(TIF)

**Text S1** Hypothesis.

(DOC)

## Author Contributions

Conceived and designed the experiments: GZ GE NW. Performed the experiments: GZ GE TB DS SP. Analyzed the data: GZ GE TB DS SFW IF NW. Wrote the paper: GZ GE. Other: Carried out the EIT examination for the patient study and participated in the analysis and interpretation of data: TB. Interpretation of the data: IF NW. Performed the statistical analysis: SFW. Read, revised and approved the final version of the manuscript: GZ GE TB DS SP SFW NW IF.

## References

1. Dreyfuss D, Saumon G (1998) Ventilator-induced lung injury: lessons from experimental studies. *Am J Respir Crit Care Med* 157: 294–323.
2. Caironi P, Cressoni M, Chiumello D, Ranieri M, Quintel M, et al. (2010) Lung opening and closing during ventilation of acute respiratory distress syndrome. *Am J Respir Crit Care Med* 181: 578–586.
3. (2000) Ventilation with lower tidal volumes as compared with traditional tidal volumes for acute lung injury and the acute respiratory distress syndrome. The Acute Respiratory Distress Syndrome Network. *N Engl J Med* 342: 1301–1308.
4. Amato MB, Barbas CS, Medeiros DM, Magaldi RB, Schettino GP, et al. (1998) Effect of a protective-ventilation strategy on mortality in the acute respiratory distress syndrome. *N Engl J Med* 338: 347–354.
5. Meade MO, Cook DJ, Guyatt GH, Slutsky AS, Arabi YM, et al. (2008) Ventilation strategy using low tidal volumes, recruitment maneuvers, and high positive end-expiratory pressure for acute lung injury and acute respiratory distress syndrome: a randomized controlled trial. *JAMA* 299: 637–645.
6. Grasso S, Stripoli T, Sacchi M, Trerotoli P, Staffieri F, et al. (2009) Inhomogeneity of lung parenchyma during the open lung strategy: a computed tomography scan study. *Am J Respir Crit Care Med* 180: 415–423.
7. Grasso S, Terragni P, Mascia L, Fanelli V, Quintel M, et al. (2004) Airway pressure-time curve profile (stress index) detects tidal recruitment/hyperinflation in experimental acute lung injury. *Crit Care Med* 32: 1018–1027.
8. Mercat A, Richard JC, Vieille B, Jaber S, Osman D, et al. (2008) Positive end-expiratory pressure setting in adults with acute lung injury and acute respiratory distress syndrome: a randomized controlled trial. *JAMA* 299: 646–655.
9. Foti G, Cereda M, Sparacino ME, De Marchi L, Villa F, et al. (2000) Effects of periodic lung recruitment maneuvers on gas exchange and respiratory mechanics in mechanically ventilated acute respiratory distress syndrome (ARDS) patients. *Intensive Care Med* 26: 501–507.
10. Tusman G, Bohm SH, Vazquez de Anda GF, do Campo JL, Lachmann B (1999) 'Alveolar recruitment strategy' improves arterial oxygenation during general anaesthesia. *Br J Anaesth* 82: 8–13.

11. Grasso S, Mascia L, Del Turco M, Malacarne P, Giunta F, et al. (2002) Effects of recruiting maneuvers in patients with acute respiratory distress syndrome ventilated with protective ventilatory strategy. *Anesthesiology* 96: 795–802.
12. Dembinski R, Hochhausen N, Terbeck S, Uhlig S, Dassow C, et al. (2007) Pumpsless extracorporeal lung assist for protective mechanical ventilation in experimental lung injury. *Crit Care Med* 35: 2359–2366.
13. Halter JM, Steinberg JM, Gatto LA, DiRocco JD, Pavone LA, et al. (2007) Effect of positive end-expiratory pressure and tidal volume on lung injury induced by alveolar instability. *Crit Care* 11: R20.
14. Brower RG, Lanken PN, MacIntyre N, Matthay MA, Morris A, et al. (2004) Higher versus lower positive end-expiratory pressures in patients with the acute respiratory distress syndrome. *N Engl J Med* 351: 327–336.
15. Briel M, Meade M, Mercat A, Brower RG, Talmor D, et al. (2010) Higher vs lower positive end-expiratory pressure in patients with acute lung injury and acute respiratory distress syndrome: systematic review and meta-analysis. *JAMA* 303: 865–873.
16. Villar J, Kacmarek RM, Perez-Mendez L, Aguirre-Jaime A (2006) A high positive end-expiratory pressure, low tidal volume ventilatory strategy improves outcome in persistent acute respiratory distress syndrome: a randomized, controlled trial. *Crit Care Med* 34: 1311–1318.
17. Andersson B, Lundin S, Lindgren S, Stenqvist O, Odenstedt Herges H (2011) End-expiratory lung volume and ventilation distribution with different continuous positive airway pressure systems in volunteers. *Acta Anaesthesiol Scand* 55: 157–164.
18. Costa EL, Borges JB, Melo A, Suarez-Sipmann F, Toufen CJ, et al. (2009) Bedside estimation of recruitable alveolar collapse and hyperdistension by electrical impedance tomography. *Intensive Care Med* 35: 1132–1137.
19. Frerichs I, Hahn G, Hellige G (1999) Thoracic electrical impedance tomographic measurements during volume controlled ventilation-effects of tidal volume and positive end-expiratory pressure. *IEEE Trans Med Imaging* 18: 764–773.
20. Miedema M, de Jongh FH, Frerichs I, van Veenendaal MB, van Kaam AH (2011) Changes in lung volume and ventilation during surfactant treatment in ventilated preterm infants. *Am J Respir Crit Care Med* 184: 100–105.
21. Dargaville PA, Rimensberger PC, Frerichs I (2010) Regional tidal ventilation and compliance during a stepwise vital capacity manoeuvre. *Intensive Care Med* 36: 1953–1961.
22. Czaplik M, Biener I, Dembinski R, Pelosi P, Soodt T, et al. (2012) Analysis of regional compliance in a porcine model of acute lung injury. *Respir Physiol Neurobiol* 184: 16–26.
23. Meier T, Luepschen H, Karsten J, Leibbecke T, Grossherr M, et al. (2008) Assessment of regional lung recruitment and derecruitment during a PEEP trial based on electrical impedance tomography. *Intensive Care Med* 34: 543–550.
24. Pulletz S, Adler A, Kott M, Elke G, Gawelczyk B, et al. (2012) Regional lung opening and closing pressures in patients with acute lung injury. *J Crit Care* 27: 323.e11–323.e18.
25. Wrigge H, Zinserling J, Muders T, Varelmann D, Gunther U, et al. (2008) Electrical impedance tomography compared with thoracic computed tomography during a slow inflation maneuver in experimental models of lung injury. *Crit Care Med* 36: 903–909.
26. Muders T, Luepschen H, Zinserling J, Greschus S, Fimmers R, et al. (2012) Tidal recruitment assessed by electrical impedance tomography and computed tomography in a porcine model of lung injury\*. *Crit Care Med* 40: 903–911.
27. Bein T, Weber F, Philipp A, Prasser C, Pfeifer M, et al. (2006) A new pumpsless extracorporeal interventional lung assist in critical hypoxemia/hypercapnia. *Crit Care Med* 34: 1372–1377.
28. Zick G, Frerichs I, Schadler D, Schmitz G, Pulletz S, et al. (2006) Oxygenation effect of interventional lung assist in a lavage model of acute lung injury: a prospective experimental study. *Crit Care* 10: R56.
29. Barber DC (1990) Quantification in impedance imaging. *Clin Phys Physiol Meas* 11 Suppl A: 45–56.
30. Frerichs I, Dargaville PA, van Genderingen H, Morel DR, Rimensberger PC (2006) Lung volume recruitment after surfactant administration modifies spatial distribution of ventilation. *Am J Respir Crit Care Med* 174: 772–779.
31. Frerichs I, Schmitz G, Pulletz S, Schadler D, Zick G, et al. (2007) Reproducibility of regional lung ventilation distribution determined by electrical impedance tomography during mechanical ventilation. *Physiol Meas* 28: S261–S267.
32. Frerichs I, Hahn G, Golisch W, Kurpitz M, Burchardi H, et al. (1998) Monitoring perioperative changes in distribution of pulmonary ventilation by functional electrical impedance tomography. *Acta Anaesthesiol Scand* 42: 721–726.
33. Frerichs I, Hahn G, Schroder T, Hellige G (1998) Electrical impedance tomography in monitoring experimental lung injury. *Intensive Care Med* 24: 829–836.
34. Ranieri VM, Rubenfeld GD, Thompson BT, Ferguson ND, Caldwell E, et al. (2012) Acute respiratory distress syndrome: the Berlin Definition. *JAMA* 307: 2526–2533.
35. Brown BH, Flewelling R, Griffiths H, Harris ND, Leathard AD, et al. (1996) EITS changes following oleic acid induced lung water. *Physiol Meas* 17 Suppl 4A: A117–A130.
36. Sinclair SE, Polissar NL, Altemeier WA (2010) Spatial distribution of sequential ventilation during mechanical ventilation of the uninjured lung: an argument for cyclical airway collapse and expansion. *BMC Pulm Med* 10: 25.
37. Hinz J, Gehoff A, Moerer O, Frerichs I, Hahn G, et al. (2007) Regional filling characteristics of the lungs in mechanically ventilated patients with acute lung injury. *Eur J Anaesthesiol* 24: 414–424.
38. Bikker IG, Leonhardt S, Bakker J, Gommers D (2009) Lung volume calculated from electrical impedance tomography in ICU patients at different PEEP levels. *Intensive Care Med* 35: 1362–1367.
39. Bikker IG, Scohy TV, Ad JJCB, Bakker J, Gommers D (2009) Measurement of end-expiratory lung volume in intubated children without interruption of mechanical ventilation. *Intensive Care Med* 35: 1749–1753.
40. Hinz J, Hahn G, Neumann P, Sydow M, Mohrenweiser P, et al. (2003) End-expiratory lung impedance change enables bedside monitoring of end-expiratory lung volume change. *Intensive Care Med* 29: 37–43.
41. Bikker IG, Preis C, Egal M, Bakker J, Gommers D (2011) Electrical impedance tomography measured at two thoracic levels can visualize the ventilation distribution changes at the bedside during a decremental positive end-expiratory lung pressure trial. *Crit Care* 15: R193.
42. Rabbani KS, Kabir AM (1991) Studies on the effect of the third dimension on a two-dimensional electrical impedance tomography system. *Clin Phys Physiol Meas* 12: 393–402.
43. Karsten J, Luepschen H, Grossherr M, Bruch HP, Leonhardt S, et al. (2011) Effect of PEEP on regional ventilation during laparoscopic surgery monitored by electrical impedance tomography. *Acta Anaesthesiol Scand* 55: 878–886.
44. Dargaville PA, Rimensberger PC, Frerichs I (2010) Regional tidal ventilation and compliance during a stepwise vital capacity manoeuvre. *Intensive Care Med* 36: 1953–1961.
45. Zick G, Schaedler D, Elke G, Pulletz S, Bein B, et al. (2009) Effects of interventional lung assist on hemodynamics and gas exchange in cardiopulmonary resuscitation: a prospective experimental study on animals with acute respiratory distress syndrome. *Crit Care* 13: R17.
46. Wang HM, Bodenstein M, Markstaller K (2008) Overview of the pathology of three widely used animal models of acute lung injury. *Eur Surg Res* 40: 305–316.
47. Hinz J, Neumann P, Dudykevych T, Andersson LG, Wrigge H, et al. (2003) Regional ventilation by electrical impedance tomography: a comparison with ventilation scintigraphy in pigs. *Chest* 124: 314–322.
48. Kunst PW, Vonk Noordegraaf A, Hoekstra OS, Postmus PE, de Vries PM (1998) Ventilation and perfusion imaging by electrical impedance tomography: a comparison with radionuclide scanning. *Physiol Meas* 19: 481–490.
49. Richard JC, Pouzot C, Gros A, Tourevielle C, Lebars D, et al. (2009) Electrical impedance tomography compared to positron emission tomography for the measurement of regional lung ventilation: an experimental study. *Crit Care* 13: R82.
